# Supplementary material for: Phase stability determination of negative thermal expansion silicates by theory and experiment
Source: Royal Society of Chemistry journal article supplement (doi:10.1039/d1cp03862a), 2021-01-01
Supplement: d1cp03862a1.pdf [file d1cp03862a1.pdf]

Supporting information

## Phase stability determination of negative thermal expansion silicates by theory and experiment

Andreas Erlebach,<sup>a</sup> Ghada Belhadj Hassine,<sup>a</sup> Christian Thieme,<sup>b</sup> Katrin Thieme,<sup>b</sup>  
Christian Rüssel,<sup>c</sup> Marek Sierka<sup>a\*</sup>

<sup>a</sup> Otto-Schott-Institute for Materials Research, Friedrich Schiller University Jena, Löbdergraben 32, 07743 Jena, Germany

<sup>b</sup> Fraunhofer Institute for Microstructure of Materials and Systems IMWS, Walter-Hülse-Straße 1, 06120, Halle (Saale), Germany

<sup>c</sup> Otto-Schott-Institute for Materials Research, Friedrich Schiller University Jena, Fraunhoferstr. 6, 07743 Jena, Germany

**Table S1.** Lattice parameters [ $\text{\AA}$ ] of HT and LT phase calculated using DFT calculations and available experimental data.

| Sample                |    | DFT      |          |          | Experiment         |                     |                    |
|-----------------------|----|----------|----------|----------|--------------------|---------------------|--------------------|
|                       |    | <i>A</i> | <i>b</i> | <i>c</i> | <i>a</i>           | <i>b</i>            | <i>c</i>           |
| BaZn <sup>a</sup>     | LT | 7.181    | 12.691   | 13.680   | 7.277              | 12.799              | 13.687             |
|                       | HT | 7.802    | 12.956   | 6.614    | 7.610 <sup>b</sup> | 13.004 <sup>b</sup> | 6.719 <sup>b</sup> |
| BaMg50                | LT | 7.146    | 12.603   | 13.767   |                    |                     |                    |
|                       | HT | 7.760    | 12.981   | 6.641    |                    |                     |                    |
| Sr50Zn <sup>c</sup>   | HT | 7.717    | 12.938   | 6.528    | 7.692 <sup>d</sup> | 12.958 <sup>d</sup> | 6.562 <sup>d</sup> |
| Sr50Mg50 <sup>c</sup> | LT | 7.100    | 12.601   | 13.518   |                    |                     |                    |
|                       | HT | 7.709    | 12.951   | 6.541    | 7.659 <sup>e</sup> | 12.956 <sup>e</sup> | 6.563 <sup>e</sup> |
| Sr25Mg75              | LT | 7.130    | 12.579   | 13.634   |                    |                     |                    |
|                       | HT | 7.719    | 12.968   | 6.611    |                    |                     |                    |

<sup>a</sup> Experimental values taken from Ref. 5

<sup>b</sup> Measured at 550 K

<sup>c</sup> Experimental values taken from Ref. 6

<sup>d</sup> Only HT phase obtained from glass crystallization

<sup>e</sup> Experimental values for Ba<sub>0.5</sub>Sr<sub>0.5</sub>Zn<sub>1.3</sub>Mg<sub>0.7</sub>Si<sub>2</sub>O<sub>7</sub> ( $x = 0.5$ ,  $y = 0.35$ )

**Table S2.** Summary of **k**-point grids used for DFT simulations (using VASP with a **k**-point density of 13 1/Å<sup>-1</sup>) and calculation of thermodynamic quantities from phonon frequencies (using phonopy with a **k**-point density of 140 1/Å<sup>-1</sup>) for the original unit cells of the low (LT) and high temperature (HT) phase and their supercells (supercell size in brackets).

| Unit cell  | DFT simulations | Phonon properties |
|------------|-----------------|-------------------|
| LT (1×1×1) | 2×1×1           | -                 |
| HT (1×1×1) | 2×1×2           | -                 |
| LT (2×1×1) | 1×1×1           | 11×11×11          |
| HT (2×1×2) | 1×1×1           | 11×11×11          |

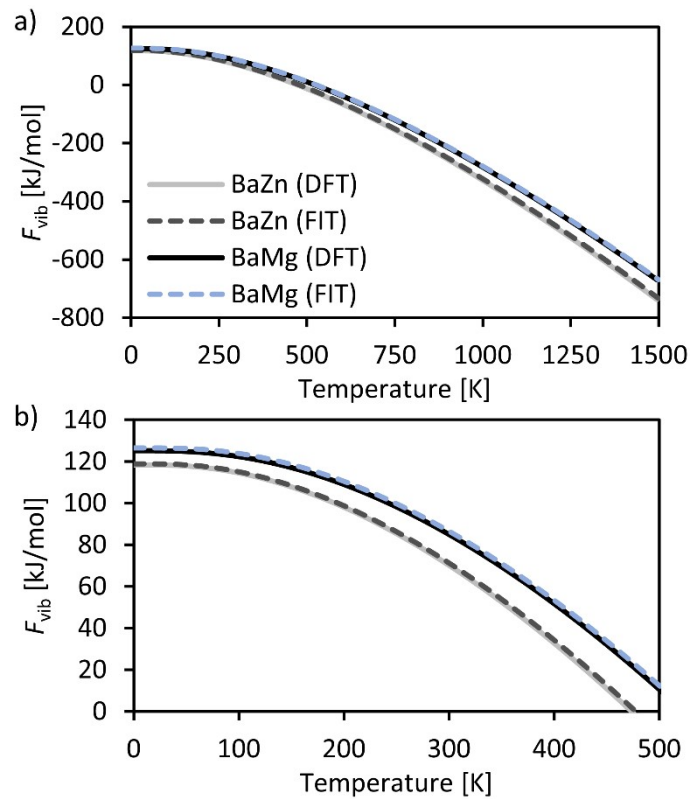

**Figure S1.** (a) Harmonic vibrational free energies  $F_{\text{vib}}$  of the high temperature phases of BaZn and BaMg calculated from phonon calculations (DFT) and the fitted model functions (FIT, eqs 1-8). (b) Low temperature range of (a).

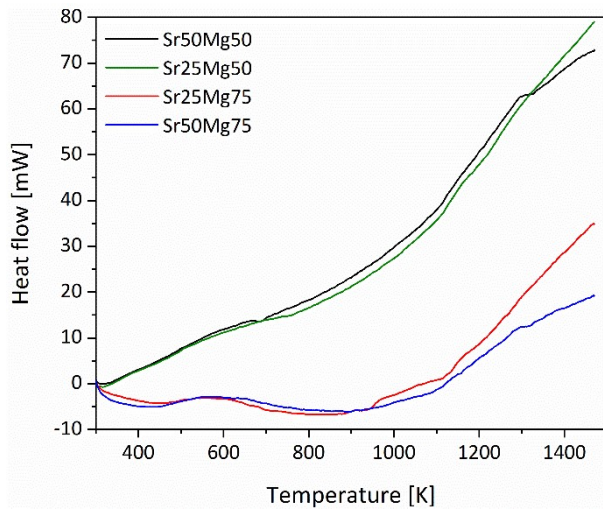

**Figure S2.** DSC profiles of the synthesized materials.

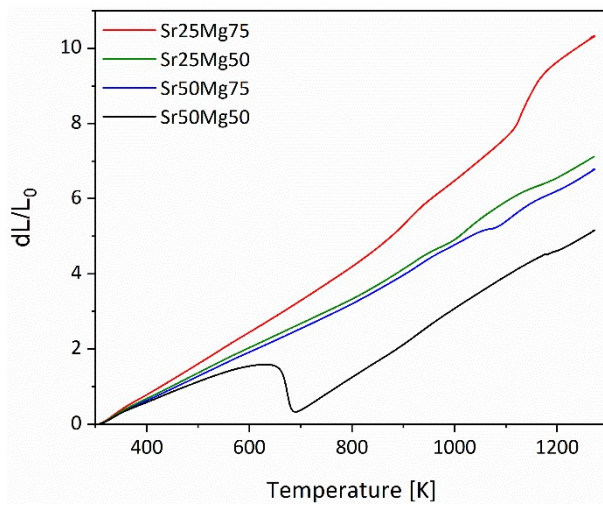

**Figure S3.** Results from dilatometry.

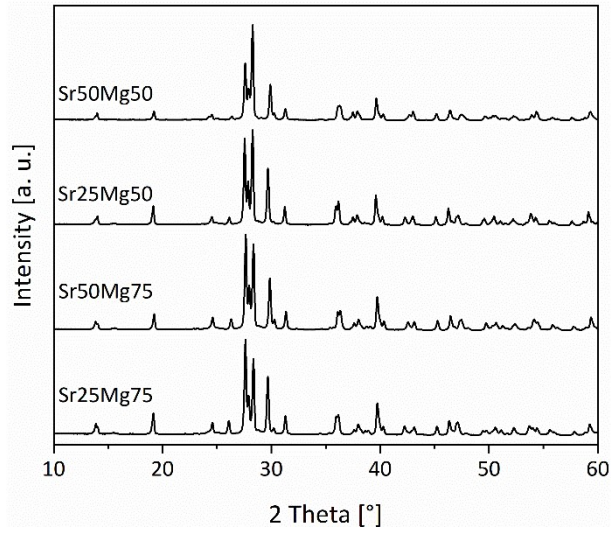

**Figure S4.** XRD patterns of the obtained compositions.
